# 1 Sexual conflict promotes species coexistence through negative 2 frequency dependence

3 Miguel Gomez-Llano<sup>1</sup>, Sofie Nilén<sup>2</sup>, Iain Moodie<sup>3</sup> and Erik I. Svensson<sup>2</sup>

4  
5 1. Department of Biological Sciences, University of Arkansas, Fayetteville AR 72701, USA

6 2. Evolutionary Ecology Unit, Department of Biology, Lund University, 223 62, Sweden

7 3. Faculty of Natural Sciences, University of Stirling, FK9 4LA, UK

## 8 9 **Abstract**

10 A major challenge in community ecology is to understand the mechanisms promoting stable  
11 local coexistence. A necessary feature of local coexistence is that species show negative  
12 frequency dependence, rescuing rare species from exclusion. However, most studies have  
13 focused on ecological differences driving negative frequency dependence, ignoring non-  
14 ecological mechanisms such as reproductive interactions. Here, we combined field studies  
15 with behavioural and mesocosm experiments to investigate how reproductive interactions  
16 within and between species promote coexistence. Our results indicate that the intensity of  
17 male mating harassment and sexual conflict increases as species become more common,  
18 reducing female productivity and leading to negative frequency dependence. Moreover, field  
19 surveys reveal that negative frequency dependence operates in natural settings, consistent  
20 with our experimental results. These results suggest that sexual conflict can promote local  
21 coexistence and highlights the importance of studying reproductive interactions together with  
22 ecological differences to better understand the mechanisms promoting species coexistence.

23

24

25 **Significance statement:** Research on the mechanisms promoting local species coexistence  
26 have focused on canonical ecological differences that increase intraspecific over interspecific  
27 competition. However, one intrinsic factor of species that can promote coexistence are the  
28 reproductive interactions. We performed a series of behavioural and mesocosm experiments  
29 manipulating species frequencies together with field observations and show that sexual  
30 conflict can decrease female fitness when species are common and promote local  
31 coexistence. Our results suggest that reproductive interactions are an understudied  
32 mechanism that can promote species coexistence even when species are ecologically  
33 equivalent.

34

### 35 **Introduction**

36 Understanding the causes underlying species diversity in ecological communities is a major  
37 challenge in both ecology and evolution. Coexistence theory predicts that negative frequency  
38 dependence is necessary for local species coexistence (1). If species have a fitness advantage  
39 when rare, they can increase from low abundance in a community and hence be rescued from  
40 competitive exclusion (1–3). Previous research has focused on how ecological differences  
41 between species can cause negative frequency dependence through rare species advantage  
42 (4–11), for example through predator susceptibility (8, 9), resource competition (5, 12) and  
43 phenology (11, 13). However, many communities are formed by species with little or no  
44 ecological differentiation (14–18). How or do such ecologically equivalent species coexist in  
45 a community? One possible answer to this question lays on an intrinsic characteristic of many  
46 species that can limit species population growth rate and promote species coexistence:  
47 reproductive interactions (19–22). Given how widespread sexual reproduction is in the tree of  
48 life, it is surprising how understudied reproductive interactions are as a mechanism for  
49 species coexistence.

50

51 Reproductive interactions can be categorized into four different groups: intraspecific  
52 interactions between the sexes, interspecific interactions between the sexes, intra- and  
53 interspecific interactions within the sexes. Importantly, not all reproductive interactions can  
54 promote local species coexistence. Intraspecific reproductive interactions between the sexes,  
55 such as male mating harassment and the resulting sexual conflict, can reduce female fitness  
56 and decrease population growth rate (23–26). Because male mating harassment and its fitness  
57 consequences for females is expected to be more intense when a species is common (23, 27–  
58 30), sexual conflict can in theory, promote local species coexistence (19, 20, 31, 32).  
59 Interspecific reproductive interactions between the sexes, when males mate or attempt to  
60 mate with females of another species (e. g., reproductive interference) (33) can lead to  
61 positive frequency dependence if females of the rare species suffer more from mating  
62 attempts by males of the common species, preventing local coexistence (34–36). Conversely,  
63 intraspecific competition within sexes (e. g., conspecific male-male competition) is expected  
64 to increase when a species is common (37). Moreover, male-male competition can affect  
65 male fitness by reducing longevity and/or male mating success (30, 38), leading to negative  
66 frequency dependence and local species coexistence (37, 39, 40). Finally, interspecific  
67 reproductive interactions within sexes (e.g., heterospecific male-male competition for mates)  
68 (41–43) can reduce male mating success and longevity (30, 37). Because the rare species will  
69 suffer more from heterospecific competition, such competition is expected to cause positive  
70 frequency dependence and prevent local species coexistence. Although male fitness is not  
71 always correlated with population growth, if males have reduced access to females, this could  
72 reduce the proportion of fertilized females and decrease population growth through  
73 reproductive collapse (44). Therefore, intra- and interspecific reproductive interactions within  
74 and between sexes can promote or prevent local species coexistence.

75

76 Importantly, these different types of reproductive interactions are likely to simultaneously  
77 operate within a given community. For example, males may compete both with conspecific  
78 and heterospecific males for mating territories (37). Because the frequency of these different  
79 reproductive interactions are likely to differ in importance and magnitude in different  
80 communities, studying only a subset of these interactions will only reveal a partial picture of  
81 community dynamics. For example, a previous study on *Calopteryx* damselflies suggested  
82 that in the presence of heterospecific male-male competition, the pressure from conspecific  
83 male mating harassment decreased and hence the intensity of sexual conflict (30). However,  
84 to the best of our knowledge no study has investigated all the different ways by which  
85 reproductive interactions within and between species can promote or prevent species  
86 coexistence.

87

88 Damselflies (Odonata: Zygoptera) have been widely used in research on sexual selection and  
89 sexual conflict, as they have intense reproductive interactions, such as conspecific male-male  
90 competition (37, 38, 45), heterospecific male-male competition (30, 37, 42, 43, 46), sexual  
91 conflict (25, 28, 30) and heterospecific matings and mating attempts (43, 47, 48). Moreover,  
92 they have been intensively used to investigate species coexistence in both the larvae (9, 10,  
93 49–54) and less extensively adult stage (37). Therefore, these characteristics of damselflies  
94 make them ideal study systems to investigate the role of reproductive interactions in  
95 promoting local species coexistence.

96

97 Here, we used a combination of mating experiments, mesocosm experiments across the entire  
98 life cycle and surveys of natural damselfly assemblages to investigate if reproductive  
99 interactions can promote or prevent local species coexistence. Our focal study organisms are

100 two species of pond damselflies, *Enallagma cyathigerum* and *Ischnura elegans* which are  
101 phenotypically very similar and they frequently co-occur (Fig. 1). Specifically we  
102 investigated 1) if any of the four types of reproductive interactions (intra- and interspecific  
103 within and between sexes) showed signs of frequency dependence; 2), if such reproductive  
104 interactions have a fitness cost; 3) if these two species are stably coexisting or only co-  
105 occurring (i.e., do they show negative frequency dependence); and 4) if these reproductive  
106 interactions and their fitness costs are likely to explain species frequencies and abundance  
107 dynamics across generations in natural communities. To answer these questions, we first  
108 carried out mating experiments where we manipulated species frequencies and test if the  
109 intensity of reproductive interactions changed when species are common compared to when  
110 rare. We proceed by quantifying the potential fitness costs of such reproductive interactions  
111 by measuring female survival and female productivity in a large multi-generational  
112 mesocosm with experimentally manipulated species frequencies. Finally, we quantified  
113 community dynamics through density- and frequency-changes at 18 communities across two  
114 generations. Taken together, our integrative study investigates if these species are stably  
115 coexisting, identifies sexual conflict as a mechanism that can promote local species  
116 coexistence, and shows that sexual conflict can explain species frequency changes across  
117 generations in natural settings. Our study therefore shows empirical evidence of a non-  
118 ecological mechanism promoting species coexistence, highlighting the need of broadening  
119 the views from traditional ecological perspectives and further integration of community  
120 ecology with evolutionary biology.

121

## 122 **Methods**

123 *Study species*

124 The common bluetail (*I. elegans*; Fig. 1A) and the common bluet (*E. cyathigerum*; Fig. 1B)  
125 are two ecologically similar and closely related damselfly species that are distributed  
126 throughout Eurasia with their northernmost range limits in Scandinavia, were they are  
127 commonly found in large numbers in ponds and lakes (55). These two damselfly species  
128 shared a most recent common ancestor at least 12.6 million years ago (56) and overlap  
129 extensively in their adult season (Fig. 1C) and are frequently locally sympatric (Fig. 1D). In  
130 southern Sweden where this study took place these species are univoltine (55), and due to  
131 their limited dispersal ability (less than 1Km) (57, 58), they can be found in a mosaic of  
132 largely discrete populations with different environmental conditions.

133

134 The reproductive behaviours of *Ischnura* and *Enallagma* are very similar. First, males are  
135 non-territorial and chase females (often several males at the time) and compete to grab the  
136 females by the prothorax using the claspers situated in the tip of their abdomens. If a male is  
137 able to find and subsequently clasp a female they form a tandem, after which the female can  
138 respond by bending the abdomen to reach the male genitalia and copulate (55) (Fig 1A).  
139 Before insemination the males remove the sperm from previous copulations (59, 60).  
140 Therefore, females gain few or no benefits from multiple matings, but will experience fitness  
141 costs that increase with the number of claspings (28). After copulating females oviposit in  
142 emergent vegetation and the larvae grow and overwinter in the aquatic stage (55). Males and  
143 females of both species are generalist predators and forage for flying insects near the water  
144 (55). During the reproductive season males interact frequently with both con- and  
145 heterospecific males, which can reduce male mating success (30, 37, 38, 42, 45, 48). In  
146 southern Sweden, where this study took place, adults of both species are found from late  
147 spring to late summer (late May to August) to reproduce (Fig 1 C).

148

149 *Are reproductive interactions frequency dependent?*

150 To investigate if any of the four types of reproductive interactions shows frequency  
151 dependence, we carried out a mating trial experiment where we varied these two species  
152 relative frequencies: common (75%) and rare (25%). We used adult males and females (aged  
153 by the stiffness of the wings) from natural populations with no visible signs of external  
154 physical harm such as wing damage. We separated the captured individuals by sex and kept  
155 them at a density of 10 individuals in netted containers (10.2 cm diameter and 22.9 cm  
156 height) during transportation to Stensoffa Ecological Field Station, southern Sweden, where  
157 the experiments took place. At the field station we set up males and females in larger netted  
158 cages (45 cm diameter and 50 cm height). We added twigs and grasses to each cage to mimic  
159 natural vegetation and allow individuals to perch or rest, and a plastic cup with water to  
160 prevent desiccation. In each cage we put six individuals of one species (three males and three  
161 females) and two individuals of the other species (one male and one female). Thus, in these  
162 cages, we had two frequency treatments, both with equal sex ratios: “common” (75%) for the  
163 most abundant species and “rare” (25%) for the less abundant species (Supplementary Table  
164 1A).

165

166 We marked all males in each cage with individual fluorescent colour powder in the genital  
167 area at the base of the abdomen and on the claspers (Fig 1B). After 24 hours, we terminated  
168 the experiment and searched for traces of colour dust on the genitalia and prothorax of the  
169 females. This technique allowed us to identify how many and which type of males (i.e., con-  
170 or heterospecifics) attempted to mate (i.e., clasped) or mated a given female, as these marked  
171 males left traces of colour dust in the female prothorax (i.e., mating attempt or clasping) and  
172 genitalia (i.e., successful mating) visible under UV-light. This method has previously been  
173 successfully used to quantify the degree of short-term male mating harassment (number of

174 male clasplings) and female mating rates in *I. elegans*, *E. cyathigerum* and other damselfly  
175 genera (28, 30, 37, 38).

176

177 To estimate the intensity of intraspecific reproductive interactions between sexes, and hence  
178 the potential for sexual conflict, we counted the number of male mating attempts (i.e.,  
179 number of clasplings per female) on conspecific females in 24 hours. We underscore that this  
180 rate of clasplings does not take into account mating attempts that did not end up in clasplings  
181 (i.e., chasing of females) or repeated clasplings of females by the same male. Therefore, our  
182 measure of sexual conflict is conservative and will underestimate the total costs of male  
183 mating harassment to female fitness. To estimate interspecific reproductive interactions  
184 between sexes we counted the number of male mating attempts of heterospecific females,  
185 using the same procedure (i.e., remnants of coloured dust on the female prothorax or  
186 genitalia) in 24 hours. This measure is also a conservative measure of male mating  
187 harassment, as it does not take into account heterospecific mating attempts that did not end  
188 up in clasplings. Finally, we quantified the costs of intra- and interspecific interactions within  
189 sexes as male mating success (mated = 1; not mated = 0). Because male-male competition  
190 can reduce male mating success (38), and if conspecific competition is stronger than  
191 heterospecific competition, male mating success is expected to decrease when species are  
192 common (i. e., negative frequency dependence). Conversely, if heterospecific male-male  
193 competition is stronger, male mating success is expected to decrease when species are rare (i.  
194 e., positive frequency dependence).

195

196 *Are reproductive interactions costly and do they cause negative frequency dependence and*  
197 *rare species fitness advantage?*

198



199 We performed a series of mesocosm experiments under semi-natural conditions in eight large  
200 square outdoor cages (3m per side; total volume 27 m<sup>3</sup>) at the field station (Fig 1E). The aim  
201 of this mesocosm experiment was to quantify adult female longevity and per capita female  
202 productivity (i. e., the number of emerging female offspring in the next generation per female  
203 in the previous generation, a measure that should closely reflect population mean fitness or  
204 mean per capita growth rate under different species frequency treatments (common, 75% and  
205 rare, 25%). Each cage contained a large water container (600L) with natural vegetation to  
206 resemble natural conditions and facilitate oviposition (Fig 1F). Each water container was  
207 inoculated repeatedly in the spring preceding these experiments with zooplankton (mainly  
208 copepods and *Daphnia*) obtained from nearby ponds and macrophytes obtained from an  
209 aquarium shop. This ensured that the damselfly larvae in our experiments would have enough  
210 food to forage and grow. A few weeks after inoculations we confirmed by visual inspections  
211 that these water containers had reproducing populations of zooplankton in the water. We  
212 added six coffee filter papers and small pieces of floating vegetation (*Phragmites australis*)  
213 to provide a resting substrate and to facilitate oviposition in these water containers. The  
214 outdoor cages were covered with mesh small enough to keep damselflies in and predators  
215 out, but wide enough to let smaller insects necessary as food for the foraging adults to enter  
216 (25, 30, 37). Importantly, these cages had no predators as we aimed to investigate if intra-  
217 and interspecific interactions could cause negative frequency dependence and potentially  
218 promote species coexistence. We have showed in previous studies that adult damselfly  
219 survival is not affected by total adult density, indicating that prey availability is not an issue  
220 in this experimental set up (30).

221

222 In each of these eight outdoor cages we manipulated species frequencies in two treatments  
223 with the same frequencies as in the mating trials described above: common (75%) and rare

224 (25%). In each cage, we included 18 conspecifics (six females and 12 males) and six  
225 heterospecifics (two females and four males) for a total of 24 individuals per cage. We  
226 carried out a total of nine replicates (five for treatment with *I. elegans* being common and  
227 four for the treatment with *E. cyathigerum* being common) during the reproductive season  
228 (June and July) (Supplementary Table 2A). We also carried out two additional control  
229 treatments that would allow us to assess if there could be contamination in our water tanks  
230 from damselfly eggs attached to the vegetation or accidentally introduced through the  
231 zooplankton inoculation. The control cages contained 24 individuals (eight females and 16  
232 males) of one species: two cages with only *I. elegans* (100 %) and two cages with only *E.*  
233 *cyathigerum* (100 %). Thus, any *E. cyathigerum* individuals that emerged in the *I. elegans*  
234 only control, and *vice versa* were considered as evidence for contamination from the outside.  
235 In each mesocosm cage, we marked every individual male and female with a unique number  
236 in two of the wings using permanent marker (such marking does not affect flight  
237 performance). This made possible measuring individual longevity by visiting these cages  
238 every day. We commonly observed marked females that mated and oviposited in the water  
239 containers inside the cages during the summer of 2018. In the two subsequent years (2019  
240 and 2020), the cages were checked daily during the reproductive season to collect all  
241 emerging individuals, which were subsequently sexed and identified to species. Per capita  
242 female productivity per species was quantified as the number of female offspring emerged  
243 divided by the total number of adult females in the initial generation. Female productivity  
244 should be closely connected to female fitness and population growth rate (61).

245

246 *Do these species show negative frequency dependence in nature?*

247 To test if our experiments show patterns consistent with assemblage dynamics (changes in  
248 species abundance) in natural populations, we surveyed 18 localities with natural *Ischnura*-

249 *Enallagma* assemblages in southern Sweden during the reproductive season of 2018 and  
250 2019, corresponding of two generations (Supplementary Table 3). These sites varied in  
251 relative species frequencies (Fig 1D). To quantify species frequencies and densities we  
252 visited each site between three and five times per season (May-July) during warm ( $>15^{\circ}\text{C}$ )  
253 days with no rain or strong wind, the most favourable conditions for these damselflies  
254 (Supplementary Table 3). During these visits, we captured as many individuals as possible  
255 with hand nets for 30 minutes, after which each individual was sexed and identified to  
256 species. The relative frequency of each species was taken as the number of individuals of that  
257 species divided by the total number of individuals of both species in each season. Species  
258 densities were calculated as encountering rate, number of individuals caught per sampling  
259 time (i. e., individuals caught per person-minute). Encountering rate has been used previously  
260 as a proxy of species density in adult damselflies (28). We calculated the changes in species  
261 densities across years (generations) by dividing the density of each species at a given site in  
262 2019 to the initial density of the same species in 2018 (number of adults in 2019 per adult in  
263 2018).

264

#### 265 *Statistical analysis*

266 Statistical analyses were carried out using generalized linear models assuming poisson  
267 (number of con- and heterospecific claspings), binomial (male mating success), negative  
268 binomial (longevity) and normal (female productivity) distributions of the residuals. The  
269 number of con- and heterospecific claspings, male mating success, female longevity and  
270 productivity were all treated as dependent variables. Species frequency, species and their  
271 interaction were included as fixed factors. In the analysis of number of con- and  
272 heterospecific claspings and male mating success in the mating experiments, we controlled  
273 for replicate cage number including it as a covariate. In the model of adult female longevity

274 in the mesocosm experiments, we included the interaction between cage and replicate as  
275 random factors. Species density changes in the 18 natural communities was analysed using a  
276 linear model with initial species frequencies in 2018, species and their interaction as fixed  
277 factors. All models were performed using the packages “lme4” (62) and “car” (63) in R (64).

278

## 279 **Results**

### 280 *Are reproductive interactions frequency dependent?*

281 We quantified the number of conspecific and heterospecific claspings from 87 females and  
282 mating success of 89 males in our mating trials. We found a significant effect of species  
283 frequency on the number of con- and heterospecific claspings of females, but in opposite  
284 directions. Females experienced more conspecific claspings when they were common than  
285 when they were rare ( $\chi^2 = 4.61$ ,  $p = 0.031$ ; Fig. 2A) but more heterospecific claspings when  
286 they were rare than when they were common ( $\chi^2 = 11.12$ ,  $p < 0.001$ ; Fig. 2B). In contrast, we  
287 found no effect of species frequency on male mating success. In all the models we found no  
288 effect of species nor the interaction between species and frequency (Supplementary Table  
289 1B-D).

290

### 291 *Are reproductive interactions costly and do they result in rare species advantage?*

292 We quantified adult longevity for 128 females (64 of each species) in our mesocosm  
293 experiments. We found no main effect of frequency treatment on female longevity nor a  
294 significant interaction between species and frequency, suggesting that neither species  
295 longevity was affected by changes in the species frequency. However, we found a significant  
296 main effect of species on female longevity ( $\chi^2 = 24.72$ ,  $p < 0.001$ ), with shorter longevity (>  
297 50%) of *E. cyathigerum* compared to *I. elegans* in these mesocosm cages (Supplementary  
298 Table 2B).

299

300 Next, we analysed female productivity (i.e., the number of female offspring in the next  
301 generation per adult female in the initial generation) in the mesocosm experiments. Female  
302 productivity differed significantly between the two species ( $F = 15.63$ ,  $p = 0.028$ ), with *I.*  
303 *elegans* females being on average more productive than *E. cyathigerum*. Importantly, we  
304 found a significant and negative effect of species frequency ( $F = 53.55$ ,  $p = 0.005$ ) on female  
305 productivity, with lower female productivity in the common compared to the rare frequency  
306 treatment (i.e., negative frequency dependence) (Fig. 3). We found no significant interaction  
307 between species identity and species frequency (Supplementary Table 2C), suggesting that  
308 the strength of negative frequency-dependence was similar in both species. The results were  
309 similar when we analysed the total number of emerging individuals in the offspring  
310 generation and the number of emerging male offspring (Supporting Table 2D). We found  
311 only minor contamination in our control cages, and our results above remain qualitatively  
312 similar after correcting for such contamination (Supplementary Analysis 1).

313

314 *Do these species show negative frequency dependence in nature?*

315 Finally, we analysed species density changes across two generations at the 18 natural  
316 sympatric sites of *I. elegans* and *E. cyathigerum*. We found a significant effect of initial  
317 species frequency (we present results on a logarithmic scale as they show better fit, although  
318 untransformed data was also significant) on species density change ( $F = 14.95$ ,  $p < 0.001$ ;  
319 Fig. 4). There was no significant effect of species identity nor the interaction between species  
320 identity and initial frequency (Supplementary Table 4), suggesting that these two species  
321 respond similarly to changes in relative frequencies in nature. These between-generation  
322 changes indicate that the higher species frequency was at a site in 2018, the more it declined

323 in abundance the following year. These results suggest negative frequency dependence,  
324 consistent with the findings in the mesocosm experiment (Fig. 3).

325

## 326 **Discussion**

327 Negative frequency dependence is an fundamental requirement for species coexistence, as a  
328 species that has a fitness advantage when rare can recover from low abundance and  
329 competitive exclusion can be prevented (1, 2). However, our understanding of the underlying  
330 mechanisms responsible for negative frequency dependence and stable coexistence is still  
331 poor (2, 65). Many previous studies have focused on the ecological niche differences by  
332 which negative interspecific interactions can be reduced, although reproductive interactions  
333 alone can also cause negative frequency dependence and promote species coexistence (19–  
334 22, 32). Our results suggest that intraspecific male mating harassment and the resulting  
335 sexual conflict it generates has the potential to reduce female productivity, causing negative  
336 frequency dependence and promoting species coexistence. To the best of our knowledge, our  
337 study is the first empirical example of how a mechanism not based on ecological niche  
338 differences can promote stable species coexistence.

339

340 Sexual conflict can have severe negative effects on female fitness and by extension reduce  
341 population growth (23–27, 66–70). Moreover, sexual conflict is expected to increase at  
342 higher densities (25, 27, 28, 30), as high densities should increase encounter rates between  
343 the sexes and thereby elevate male mating harassment on females (25, 28). If the negative  
344 fitness effects of sexual conflict on females are larger when species are common and reduced  
345 when rare, sexual conflict could lead to negative frequency-dependence and rescue rare  
346 species from competitive exclusion (19, 20). Consistent with these predictions, we found  
347 evidence for negative frequency-dependence on female productivity (Fig. 3). Our mating

348 experiments suggest that sexual conflict could be the driving mechanism causing negative  
349 frequency dependence. Although other mechanisms (e.g., predation, cannibalism), especially  
350 during larvae stage could also influence species relative frequency changes in the wild.  
351 Conversely, heterospecific mating attempts are likely to be shorter in duration, given that  
352 females reject heterospecific males and given that heterospecific male claspers do typically  
353 not match female prothorax structures (71, 72). Therefore, heterospecific mating attempts are  
354 likely to be less costly than conspecific male mating attempts.

355

356 We suggest that the loss of female productivity in our mesocosm experiment corresponds to a  
357 doubling of male mating harassment, measured as the number of conspecific claspings in  
358 both *E. cyathigerum* and *I. elegans* when they are common (Fig. 2A). In our mesocosm  
359 experiments, female productivity of *E. cyathigerum* when common was only 17% of the  
360 productivity when rare, and in *I. elegans* productivity when common was only 27% of the  
361 productivity when rare, demonstrating strong negative frequency dependence of female  
362 fitness. Moreover, in damselflies, males remove the sperm from previous copulations, leading  
363 to no obvious female benefits from multiple matings (59, 60). Our experimental setup only  
364 allowed us to identify if a male attempted to mate a female if he managed to clasp her, but we  
365 could not quantify mating attempts that did not result in claspings (i.e., chasing and fighting),  
366 nor if there were multiple mating attempts by the same male. Moreover, the effect of male  
367 harassment on females might not translate only in loss of fecundity but also reduce larvae  
368 survival (73). Therefore, our measure of sexual conflict is likely to be conservative and  
369 underestimate the true level of total mating harassment that females are likely to have  
370 experienced in our experimental settings and in nature.

371

372 In addition to male mating harassment and sexual conflict in the adult stage, intra- and  
373 interspecific competition during the aquatic larval stage could also potentially have decreased  
374 the number of adult female emergences. However, a previous study found that under the  
375 current environmental conditions, *I. elegans* and *E. cyathigerum* larvae were competitive  
376 equivalent (54). Moreover, previous experimental evidence with different *Ischnura* and  
377 *Enallagma* species from North America showed no frequency-dependent mortality or growth  
378 rate in larvae in the absence of predators (52). In agreement with our mesocosms with no  
379 predators (*but see* (50) for an effect of relative frequency in growth rates). However, in  
380 natural settings damselfly species coexistence can be achieved by predation during larvae  
381 causing negative frequency dependence (9, 52). Moreover, *Ischnura* and *Enallagma* species  
382 in North America show striking larval behavioural differences, with *Ischnura* being more  
383 active and susceptible to fish or dragonfly predators (53). Given that damselflies in our area  
384 occur in a mosaic of lakes with fish or dragonflies as the top predator, as well as in the  
385 absence of them, it is likely that different mechanisms could be acting separately or  
386 synergistically in the different localities. However, in the absence of top predators, sexual  
387 conflict could have a sufficiently large effect to rescue populations from exclusion and  
388 promote coexistence.

389

390 We have experimentally investigated how sexual conflict can affect species coexistence and  
391 by extension the maintenance of local diversity. Our results point to the importance of  
392 mechanisms based on the intrinsic reproductive interactions within species and suggest that  
393 sexual conflict can generate negative frequency dependence and promote species coexistence.  
394 However, further evaluating the relative importance and interaction of reproductive  
395 interactions with other ecological factors, such as the presence and type of predators, would  
396 help us better understand the mechanisms promoting species coexistence in nature.



397

398 **References**

- 399 1. P. Chesson, Mechanisms of maintenance of species diversity. *Annu. Rev. Ecol. Syst.* **31**,  
400 343–366 (2000).
- 401 2. P. B. Adler, J. HilleRisLambers, J. M. Levine, A niche for neutrality. *Ecol Lett* **10**, 95–  
402 104 (2007).
- 403 3. R. MacArthur, R. Levins, The limiting similarity, convergence, and divergence of  
404 coexisting species. *Am. Nat.* **101**, 377–385 (1967).
- 405 4. F. J. Ayala, Competition between species: frequency dependence. *Science* **171**, 820–824  
406 (1971).
- 407 5. R. H. MacArthur, *Geographical ecology: patterns in the distribution of species*  
408 (Princeton University Press, 1972).
- 409 6. S. J. Hausch, J. W. Fox, S. M. Vamosi, Coevolution of competing *Callosobruchus*  
410 species does not stabilize coexistence. *Ecol. Evol.* **7**, 6540–6548 (2017).
- 411 7. C. Wills, *et al.*, Nonrandom processes maintain diversity in tropical forests. *Science* **311**,  
412 527–531 (2006).
- 413 8. P. Chesson, J. J. Kuang, The interaction between predation and competition. *Nature* **456**,  
414 235–238 (2008).
- 415 9. J. T. Bried, A. M. Siepielski, Predator driven niches vary spatially among co-occurring  
416 damselfly species. *Evol. Ecol.* **33**, 243–256 (2019).
- 417 10. B. H. Ousterhout, M. Serrano, J. T. Bried, A. M. Siepielski, A framework for linking  
418 competitor ecological differences to coexistence. *J. Anim. Ecol.* (2019).
- 419 11. C. Blackford, R. M. Germain, B. Gilbert, Species differences in phenology shape  
420 coexistence. *Am. Nat.* **195**, E168–E180 (2020).
- 421 12. T. W. Schoener, Resource partitioning in ecological communities. *Science* **185**, 27–39  
422 (1974).
- 423 13. J. Usinowicz, *et al.*, Temporal coexistence mechanisms contribute to the latitudinal  
424 gradient in forest diversity. *Nature* **550**, 105–108 (2017).
- 425 14. C. Boake, Sexual selection and speciation in Hawaiian *Drosophila*. *Behav. Genet.* **35**  
426 (2005).
- 427 15. W. Salzburger, The interaction of sexually and naturally selected traits in the adaptive  
428 radiations of cichlid fishes. *Molec. Ecol.* **18**, 169–185 (2009).
- 429 16. T. Price, I. J. Lovette, E. Bermingham, H. L. Gibbs, A. D. Richman, The Imprint of  
430 History on Communities of North American and Asian Warblers. *Am. Nat.* **156**, 354–  
431 367 (2000).

- 432 17. M. A. McPeck, J. M. Brown, Building a regional species pool: diversification of the  
433 Enallagma damselflies in eastern North America. *Ecology* **81**, 904 (2000).
- 434 18. A. M. Siepielski, A. Z. Hasik, B. H. Ousterhout, An ecological and evolutionary  
435 perspective on species coexistence under global change. *Curr. Opin. Ins. Scien.* **29**, 71–  
436 77 (2018).
- 437 19. D.-Y. Zhang, I. Hanski, Sexual reproduction and stable coexistence of identical  
438 competitors. *J. Theor. Biol.* **193**, 465–473 (1998).
- 439 20. K. Kobayashi, Sexual selection sustains biodiversity via producing negative density-  
440 dependent population growth. *J. Ecol.* **107**, 1433–1438 (2019).
- 441 21. Osamu K. Mikami, M. Kohda, M. Kawata, A new hypothesis for species coexistence:  
442 male-male repulsion promotes coexistence of competing species. *Popul Ecol* **46** (2004).
- 443 22. L. Ruokolainen, I. Hanski, Stable coexistence of ecologically identical species:  
444 conspecific aggregation via reproductive interference. *J Anim Ecol* **85**, 638–647 (2016).
- 445 23. H. Kokko, R. Brooks, Sexy to die for? Sexual selection and the risk of extinction in  
446 *Annales Zoologici Fennici*, (JSTOR, 2003), pp. 207–219.
- 447 24. J.-F. Le Galliard, P. S. Fitze, R. Ferrière, J. Clobert, Sex ratio bias, male aggression, and  
448 population collapse in lizards. *PNAS* **102**, 18231–18236 (2005).
- 449 25. Y. Takahashi, K. Kagawa, E. I. Svensson, M. Kawata, Evolution of increased phenotypic  
450 diversity enhances population performance by reducing sexual harassment in  
451 damselflies. *Nat Commun* **5**, 4468 (2014).
- 452 26. L. Yun, *et al.*, Competition for mates and the improvement of nonsexual fitness. *PNAS*  
453 **115**, 6762–6767 (2018).
- 454 27. H. Kokko, D. J. Rankin, Lonely hearts or sex in the city? Density-dependent effects in  
455 mating systems. *Phil. Trans. R Soc B* **361**, 319–334 (2006).
- 456 28. T. P. Gosden, E. I. Svensson, Density-dependent male mating harassment, female  
457 resistance, and male mimicry. *Am Nat* **173**, 709–721 (2009).
- 458 29. O. Y. Martin, D. J. Hosken, The evolution of reproductive isolation through sexual  
459 conflict. *Nature* **423**, 979–982 (2003).
- 460 30. M. A. Gomez-Llano, H. M. Bensch, E. I. Svensson, Sexual conflict and ecology: Species  
461 composition and male density interact to reduce male mating harassment and increase  
462 female survival. *Evolution* **72**, 906–915 (2018).
- 463 31. K. Kobayashi, Sexual reproduction and diversity: Connection between sexual selection  
464 and biological communities via population dynamics. *Popul Ecol* **61**, 135–140 (2019).
- 465 32. M. Yamamichi, *et al.*, Intraspecific adaptation load: a mechanism for species coexistence.  
466 *Trend Ecol Evol* (2020).

- 467 33. G. F. Grether, K. S. Peiman, J. A. Tobias, B. W. Robinson, Causes and consequences of  
468 behavioral interference between species. *Trend Ecol Evol* **32**, 760–772 (2017).
- 469 34. E. Kuno, Competitive exclusion through reproductive interference. *Res Popul Ecol* **34**,  
470 275–284 (1992).
- 471 35. P. Amarasekare, Interference competition and species coexistence. *Proc R Soc Lond B*  
472 **269**, 2541–2550 (2002).
- 473 36. J. Whitton, C. J. Sears, W. P. Maddison, Co-occurrence of related asexual, but not sexual,  
474 lineages suggests that reproductive interference limits coexistence. *Proc. R. Soc. B* **284**,  
475 20171579 (2017).
- 476 37. E. I. Svensson, M. A. Gómez-Llano, A. R. Torres, H. M. Bensch, Frequency dependence  
477 and ecological drift shape coexistence of species with similar niches. *Am Nat* **191**, 691–  
478 703 (2018).
- 479 38. M. Gómez-Llano, A. Narasimhan, E. I. Svensson, Male-male competition causes  
480 parasite-mediated sexual selection for local adaptation. *Am Nat* **196**, 344–354 (2020).
- 481 39. M. Kohda, Does male-mating attack in the herbivorous cichlid, *Petrochromis polyodon*,  
482 facilitate the coexistence of congeners? *Ecol Freshw Fish* **4**, 152–159 (1995).
- 483 40. M. Kohda, “Coexistence of permanently territorial cichlids of the genus *Petrochromis*  
484 through male-mating attack” in *Fish Biology in Japan: An Anthology in Honour of*  
485 *Hiroya Kawanabe*, (Springer, 1998), pp. 231–242.
- 486 41. K. A. Dixon, W. H. Cade, Some factors influencing male-male aggression in the field  
487 cricket *Gryllus integer* (time of day, age, weight and sexual maturity). *Anim Behav* **34**,  
488 340–346 (1986).
- 489 42. J. P. Drury, G. F. Grether, Interspecific aggression, not interspecific mating, drives  
490 character displacement in the wing coloration of male rubyspot damselflies (*Hetaerina*).  
491 *Proc. R. Soc. B* **281**, 20141737 (2014).
- 492 43. J. P. Drury, *et al.*, A general explanation for the persistence of reproductive interference.  
493 *Am Nat* **194**, 268–275 (2019).
- 494 44. E. J. Milner-Gulland, *et al.*, Reproductive collapse in saiga antelope harems. *Nature* **422**,  
495 135–135 (2003).
- 496 45. G. F. Grether, J. P. Drury, E. Berlin, C. N. Anderson, The role of wing coloration in sex  
497 recognition and competitor recognition in rubyspot damselflies (*Hetaerina* spp.).  
498 *Ethology* **121**, 674–685 (2015).
- 499 46. K. Tynkkynen, M. J. Rantala, J. Suhonen, Interspecific aggression and character  
500 displacement in the damselfly *Calopteryx splendens*. *J Evol Biol* **17**, 759–767 (2004).
- 501 47. E. I. Svensson, K. Karlsson, M. Friberg, F. Eroukhmanoff, Gender differences in species  
502 recognition and the evolution of asymmetric sexual isolation. *Curr Biol* **17**, 1943–1947  
503 (2007).

- 504 48. J. P. Drury, K. W. Okamoto, C. N. Anderson, G. F. Grether, Reproductive interference  
505 explains persistence of aggression between species. *Proc. R. Soc. B* **282**, 20142256–  
506 20142256 (2015).
- 507 49. A. M. Siepielski, K.-L. Hung, E. E. B. Bein, M. A. McPeck, Experimental evidence for  
508 neutral community dynamics governing an insect assemblage. *Ecology* **91**, 847–857  
509 (2010).
- 510 50. A. M. Siepielski, A. N. Mertens, B. L. Wilkinson, M. A. McPeck, Signature of ecological  
511 partitioning in the maintenance of damselfly diversity. *J Anim Ecol* **80**, 1163–1173  
512 (2011).
- 513 51. A. M. Siepielski, A. Nemirov, M. Cattivera, A. Nickerson, Experimental evidence for an  
514 eco-evolutionary coupling between local adaptation and intraspecific competition. *Am*  
515 *Nat* **187**, 447–456 (2016).
- 516 52. M. A. McPeck, The consequences of changing the top predator in a food web: a  
517 comparative experimental approach. *Ecol Monog* **68**, 1–23 (1998).
- 518 53. M. A. McPeck, The growth/predation risk trade-off: so what is the mechanism? *Am Nat*  
519 **163**, E88–E111 (2004).
- 520 54. L. T. Lancaster, G. Morrison, R. N. Fitt, Life history trade-offs, the intensity of  
521 competition, and coexistence in novel and evolving communities under climate change.  
522 *Phil Trans R Soc B* **372**, 20160046 (2017).
- 523 55. P. S. Corbet, *Dragonflies: behaviour and ecology of Odonata* (Harley Books, 1999).
- 524 56. J. Swaegers, *et al.*, Ecological and evolutionary drivers of range size in *Coenagrion*  
525 damselflies. *J Evol Biol* **27**, 2386–2395 (2014).
- 526 57. K. F. Conrad, *et al.*, Characteristics of dispersing *Ischnura elegans* and *Coenagrion*  
527 *puella* (Odonata): age, sex, size, morph and ectoparasitism. *Ecography* **25**, 439–445  
528 (2002).
- 529 58. K. F. Conrad, K. H. Willson, I. F. Harvey, C. J. Thomas, T. N. Sherratt, Dispersal  
530 characteristics of seven odonate species in an agricultural landscape. *Ecography* **22**,  
531 524–531 (1999).
- 532 59. O. M. Fincke, Sperm competition in the damselfly *Enallagma hageni* Walsh (Odonata:  
533 Coenagrionidae): benefits of multiple mating to males and females. *Behav Ecol*  
534 *Sociobiol* **14**, 235–240 (1984).
- 535 60. A. Córdoba-Aguilar, E. Uhía, A. C. Rivera, Sperm competition in Odonata (Insecta): the  
536 evolution of female sperm storage and rivals' sperm displacement. *J. Zoology* **261**, 381–  
537 398 (2003).
- 538 61. H. Caswell, Analysis of life table response experiments I. Decomposition of effects on  
539 population growth rate. *Ecological Modelling* **46**, 221–237 (1989).
- 540 62. D. Bates, M. Mächler, B. Bolker, S. Walker, Fitting linear mixed-effects models using  
541 lme4. *J Statis Software* **67**, 1–48 (2015).

- 542 63. J. Fox, S. Weisberg, *An {R} companion to applied regression*, Third (Sage, 2011).
- 543 64. R Development Core Team, *R: A language and environment for statistical computing* (R  
544 foundation for statistical computing Vienna, Austria, 2018).
- 545 65. M. A. McPeck, A. M. Siepielski, Disentangling ecologically equivalent from neutral  
546 species: The mechanisms of population regulation matter. *J Anim Ecol* **88**, 1755–1765  
547 (2019).
- 548 66. A. E. Magurran, B. H. Seghers, A cost of sexual harassment in the guppy, *Poecilia*  
549 *reticulata*. *Proc. R. Soc. Lond. B* **258**, 89–92 (1994).
- 550 67. T. A. F. Long, A. Pischedda, A. D. Stewart, W. R. Rice, A cost of sexual attractiveness to  
551 high-fitness females. *PLoS Biol* **7**, e1000254 (2009).
- 552 68. S. F. Chenoweth, N. C. Appleton, S. L. Allen, H. D. Rundle, Genomic evidence that  
553 sexual selection impedes adaptation to a novel environment. *Curr Biol* **25**, 1860–1866  
554 (2015).
- 555 69. R. García-Roa, M. Serra, P. Carazo, Ageing via perception costs of reproduction  
556 magnifies sexual selection. *Proc. R. Soc. B* **285**, 20182136 (2018).
- 557 70. M. J. F. Martins, T. M. Puckett, R. Lockwood, J. P. Swaddle, G. Hunt, High male sexual  
558 investment as a driver of extinction in fossil ostracods. *Nature* **556**, 366–369 (2018).
- 559 71. M. A. McPeck, L. Shen, J. Z. Torrey, H. Farid, The tempo and mode of three-  
560 dimensional morphological evolution in male reproductive structures. *Am Nat* **171**,  
561 E158–E178 (2008).
- 562 72. H. M. Robertson, H. E. Paterson, Mate recognition and mechanical isolation in  
563 *Enallagma* damselflies (Odonata: Coenagrionidae). *Evolution*, 243–250 (1982).
- 564 73. D. K. Dowling, B. R. Williams, F. Garcia-Gonzalez, Maternal sexual interactions affect  
565 offspring survival and ageing. *J Evol Biol* **27**, 88–97 (2014).

566

567 **Acknowledgements:** Adam Siepielski for critical comments on earlier versions of this  
568 manuscript. MGL was supported by NSF DEB1748945 and The Royal Physiographic  
569 Society of Lund. ES was supported by The Swedish Research Council (2016-03356), Carl  
570 Tryggers Fundtion, Gyllenstiemska Krapperupstiftelsen (KR2018-0038), Lunds  
571 Djurskyddsfond, The Royal Physiographic Society of Lund, Stiftelsen Olle Engqvist  
572 Byggmästare, and the Stina Werners Foundation. SN was supported by the Sven and Lili  
573 Lawski's Foundation.

574

575 **Authors contributions:** MGL and ES design the study. All authors carried out the  
576 experiments. MGL perform the analysis and wrote the text with input from all the authors.

577

578 **Competing interests:** No competing interests

579 **Figure 1.** We used two species of damselflies *I. elegans* (**A**) and *E. cyathigerum* (**B**) to study  
580 the role of sexual conflict in species coexistence. These species are ecologically similar, and  
581 they overlap during the adult life stage (**C**). We performed mating experiments in small cages  
582 in which we marked male claspers and genitalia (**D**) to measure the intensity of different  
583 reproductive interactions when species are common and rare. We performed mesocosm  
584 experiments in large outdoor cages (**E**) with water containers (**F**) across the full life cycle to  
585 measure the costs of reproductive interactions. Finally, we did community surveys in 18 wild  
586 populations with different species frequencies (**G**) to estimate how species density changes  
587 were affected by initial species frequencies.

588

589 **Figure 2.** We perform a series of mating experiments in which we manipulated species  
590 frequencies, “rare” (25%) and “common (75%) to test the intensity of intra and interspecific  
591 reproductive interactions (Supplementary Table 1). We found that the intensity of sexual  
592 conflict, measured as the number of mating attempts (i.e., claspings), was more intense when  
593 species were common than when rare (**A**). Heterospecific matings attempts followed the  
594 opposite pattern, females experiencing more mating attempts by heterospecifics when rare  
595 than when common (**B**). Points show the means and error bars the standard error.  
596



597 **Figure 3.** We used mesocosm experiments to quantify the costs of sexual conflict in female  
598 fitness. We found strong negative frequency-dependence in female productivity (measured as  
599 the number of female offspring that emerge in the following generation per female in the  
600 initial generation), having higher fitness when rare over common. Similar results were found  
601 when we analyzed total productivity (i.e., number of offspring emerged per adult female in  
602 the initial generation; Supplementary Table 2). Points show the means and error bars the  
603 standard error.  
604

605 **Figure 4.** We monitored damselfly communities in 18 localities during two consecutive years  
606 (2018-2019; Supplementary Table 3). We calculated the initial species frequency in 2018 and  
607 the species density change (i.e., species density in 2019/ density in 2018). We found evidence  
608 for negative frequency dependence and rare species advantage in both *I. elegans* and *E.*  
609 *cyathigerum* (Supplementary Table 4). Higher the initial species frequency in 2018 suffer a  
610 density decline, lower initial frequencies increase their densities. Points show individuals  
611 observations at each locality, line show model predictions (best fit with in a logarithmic  
612 regression) and shaded areas confidence interval.  
613

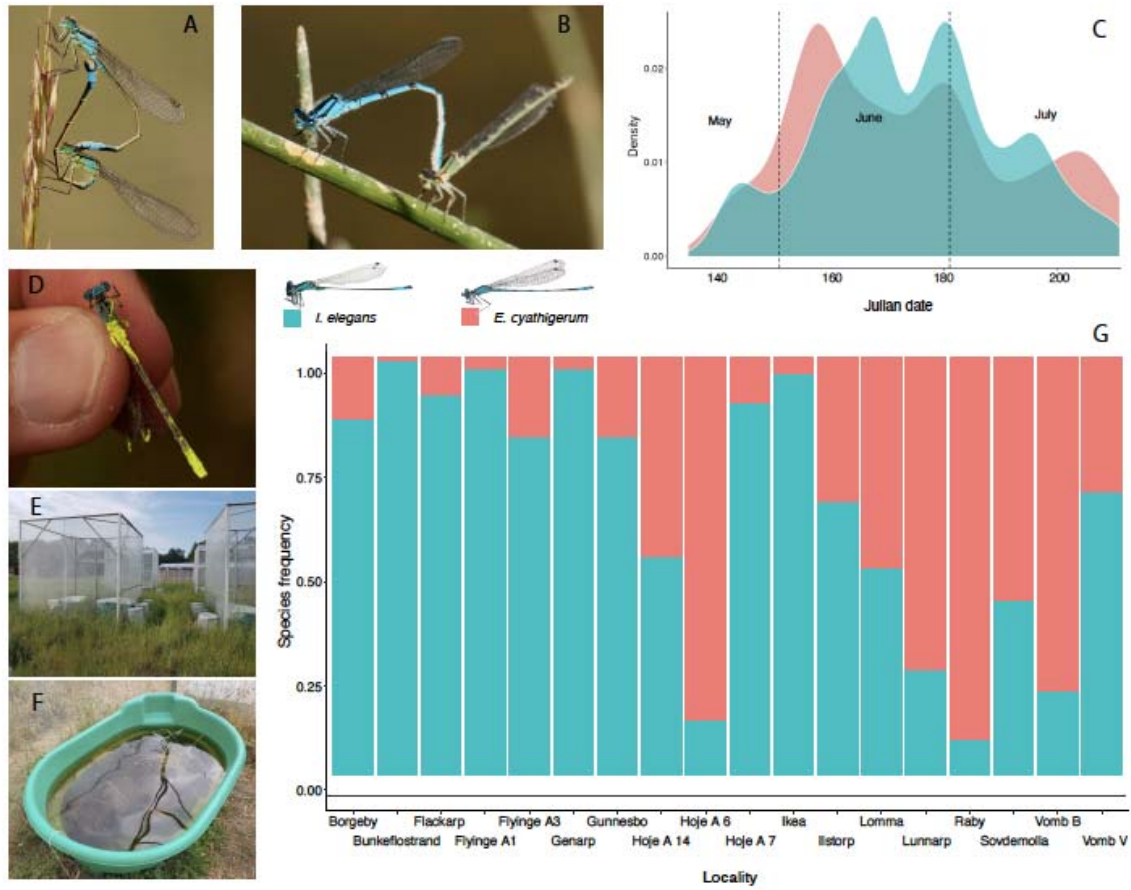

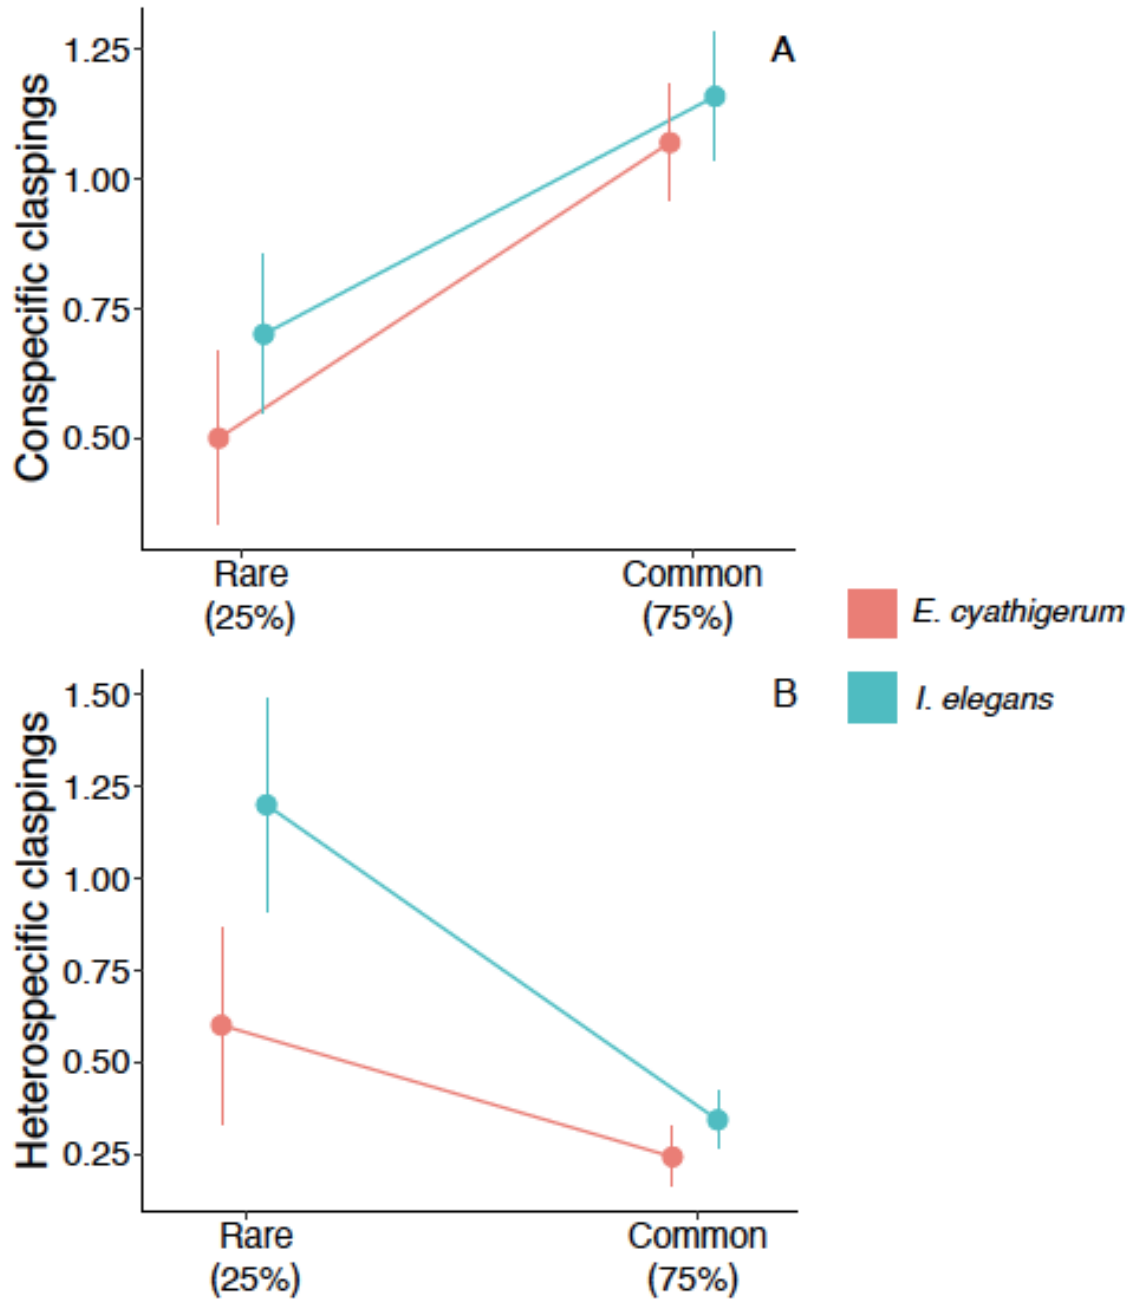

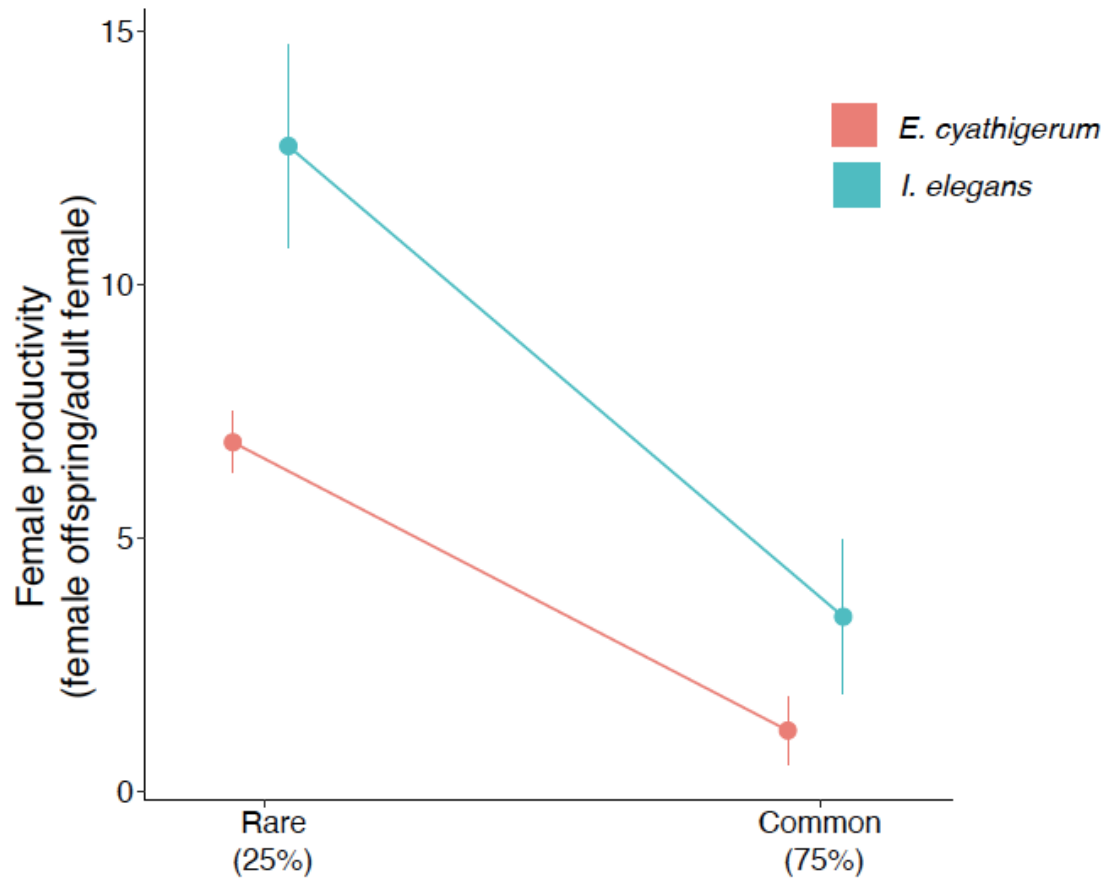

616

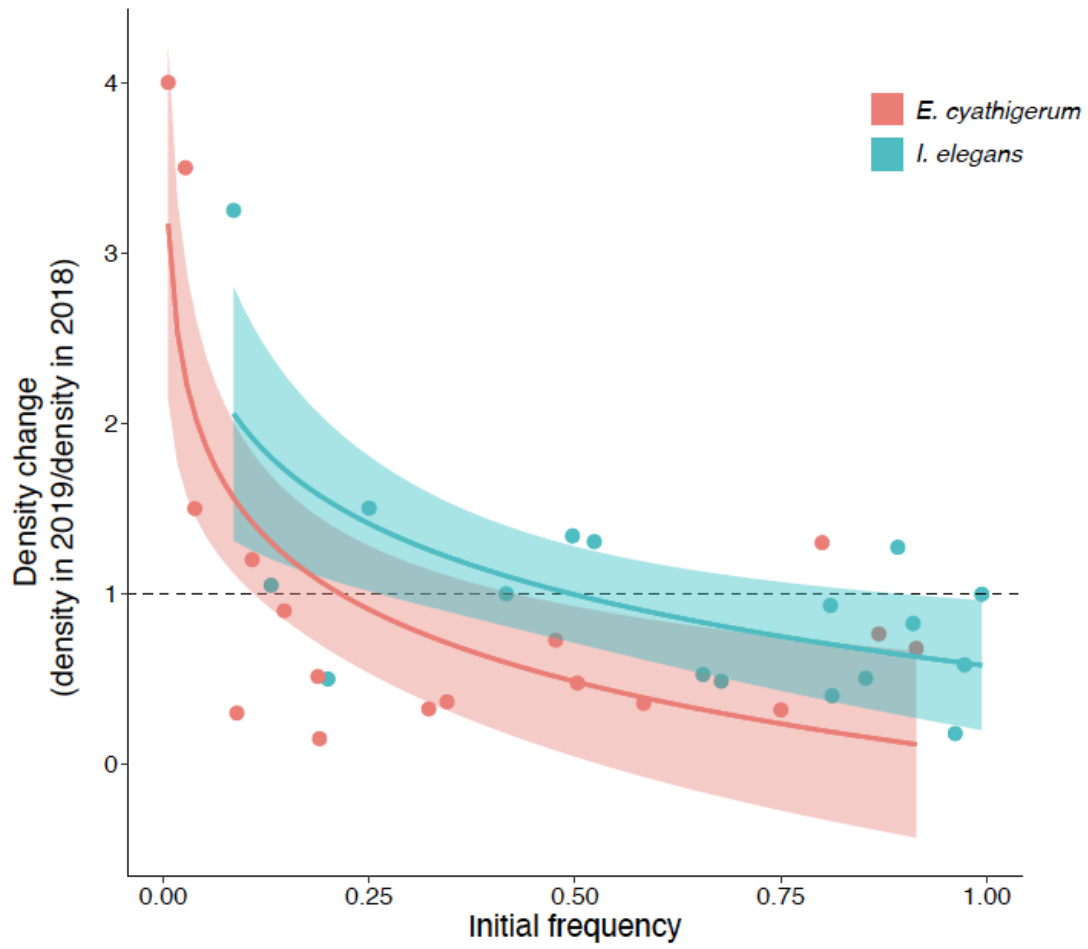

617

618

619

620

621

622

623

624

625

626

627

628

629

## Supplementary Information

630

### Sexual conflict promotes species coexistence through negative frequency dependence

631

Miguel Gómez-Llano, Sofie Nilén, Iain R. Moodie and Erik I. Svensson

632

633

**Supplementary Table 1.** We performed a series of behavioural mating assays in which we

634

quantified con- and heterospecific mating attempts and male mating success under different

635

frequency treatments. The sample sizes in the different frequency treatments, number of

636

individuals used of each sex and number of replicates are shown in (A). We analysed the

637

effects of species frequency, species and their interaction in conspecific claspings (B),

638

heterospecific claspings (C) and for male mating success (D).

639

A) Species composition and sample sizes in the behavioural mating experiments.

| Species frequency | Species               | No. males | No. females | Replicates | Tot. males | Tot. females |
|-------------------|-----------------------|-----------|-------------|------------|------------|--------------|
| Common (75%)      | <i>I. elegans</i>     | 3         | 3           | 13         | 39         | 39           |
| Rare (25%)        | <i>E. cyathigerum</i> | 1         | 1           |            | 13         | 13           |
| Common (75%)      | <i>E. cyathigerum</i> | 3         | 3           | 10         | 30         | 30           |
| Rare (25%)        | <i>I. elegans</i>     | 1         | 1           |            | 10         | 10           |

640

641

B) Number of conspecific male claspings.

|                     | $\chi^2$ | df | P            |
|---------------------|----------|----|--------------|
| Replicate           | 0.25     | 1  | 0.614        |
| Frequency           | 4.61     | 1  | <b>0.031</b> |
| Species             | 0.44     | 1  | 0.504        |
| Frequency : Species | 0.08     | 1  | 0.772        |

642

643

C) Number of heterospecific claspings.

|                     | $\chi^2$ | df | P                |
|---------------------|----------|----|------------------|
| Replicate           | 0.007    | 1  | 0.933            |
| Frequency           | 11.12    | 1  | <b>&lt;0.001</b> |
| Species             | 2.38     | 1  | 0.122            |
| Frequency : Species | 0.207    | 1  | 0.648            |

644

645 D) Male mating success (mated=1; un-mated=0).

|                     | $\chi^2$ | df | P     |
|---------------------|----------|----|-------|
| Replicate           | 0.34     | 1  | 0.559 |
| Frequency           | 0.271    | 1  | 0.602 |
| Species             | 0.149    | 1  | 0.699 |
| Frequency : Species | 0.148    | 1  | 0.699 |

646

647 **Supplementary Table 2.** We carried out multi-generational mesocosm experiments in large  
 648 outdoor cages with water containers across the entire life-cycle of damselflies (Fig. 1). We  
 649 estimated female productivity (number of emerging female offspring in the next generation  
 650 per adult female in the initial generation) for the two different species (*I. elegans* and *E.*  
 651 *cyathigerum*) under the two different frequency treatments (Rare: 25 % and Common: 75 %).  
 652 Sample sizes in the different frequency treatments, number of individuals per replicate and in  
 653 total and the number of replicates are shown in (A). We analysed the effect of species  
 654 frequency, species and their interaction on female longevity (B), female productivity  
 655 (measured as the number of female offspring emerged in the next generation per adult female  
 656 in the parental generation in 2018; C), and total female productivity (measured as the total  
 657 number of offspring emerged in the next generation per adult female in the parental  
 658 generation; D).

659 A) Species composition and sample sizes in the mesocosm experiments.

| Species frequency | Species               | No. males | No. females | Replicates | Tot. males | Tot. females |
|-------------------|-----------------------|-----------|-------------|------------|------------|--------------|
| Common (75%)      | <i>I. elegans</i>     | 12        | 6           | 5          | 60         | 30           |
| Rare (25%)        | <i>E. cyathigerum</i> | 4         | 2           |            | 20         | 10           |
| Common (75%)      | <i>E. cyathigerum</i> | 12        | 6           | 4          | 48         | 24           |
| Rare (25%)        | <i>I. elegans</i>     | 4         | 2           |            | 16         | 8            |

660

661 B) Adult female longevity (days).

|                     | $\chi^2$ | df | P              |
|---------------------|----------|----|----------------|
| Frequency           | 0.116    | 1  | 0.733          |
| Species             | 24.724   | 1  | < <b>0.001</b> |
| Frequency : Species | 0.1003   | 1  | 0.751          |



662

663 C) Female per-capita productivity (No. emerging female offspring in 2019 and 2020).

|                     | F     | df | P            |
|---------------------|-------|----|--------------|
| Frequency           | 31.68 | 1  | <b>0.004</b> |
| Species             | 9.25  | 1  | <b>0.038</b> |
| Frequency : Species | 1.83  | 1  | 0.247        |

664

665 D) Total female per-capita productivity (No. emerging female and male offspring in the  
666 next generation per female; data from 2019 and 2020).

|                     | F     | df | P            |
|---------------------|-------|----|--------------|
| Frequency           | 18.29 | 1  | <b>0.012</b> |
| Species             | 5.11  | 1  | 0.086        |
| Frequency : Species | 1.2   | 1  | 0.333        |

667

668 **Supplementary Table 3.** We monitored community dynamics at 18 natural sites during the  
669 reproductive season of 2018 and 2019, quantifying the relative species frequency and density  
670 in both years. Here we provide information about the geographic locations of these different  
671 sites.

| Locality       | Coordinates          | Visits in<br>2018 | Visits in<br>2019 |
|----------------|----------------------|-------------------|-------------------|
| Borgeby        | 55.738868, 13.047789 | 3                 | 4                 |
| Bunkeflostrand | 55.538688, 12.923294 | 4                 | 5                 |
| Flackarp       | 55.689522, 13.167998 | 4                 | 5                 |
| Flyinge 30 A1  | 55.745274, 13.359529 | 5                 | 4                 |
| Flyinge 30 A3  | 55.749590, 13.339951 | 4                 | 4                 |
| Genarp         | 55.608782, 13.385463 | 5                 | 5                 |
| Gunnesbo       | 55.734698, 13.153432 | 4                 | 5                 |
| Höje Å 14      | 55.649639, 13.319925 | 4                 | 4                 |
| Hoje Å 6       | 55.680208, 13.257543 | 4                 | 5                 |

|                          |                      |   |   |
|--------------------------|----------------------|---|---|
| Hoje Å 7                 | 55.669535, 13.300354 | 4 | 5 |
| IKEA (Malmö)             | 55.553535, 12.983824 | 3 | 4 |
| Ilstorp                  | 55.616181, 13.663855 | 4 | 5 |
| Lomma Kyrkdamm           | 55.684672, 13.085663 | 4 | 5 |
| Lunnarp                  | 55.649298, 13.330419 | 5 | 5 |
| Råbydammen               | 55.686356, 13.233741 | 3 | 4 |
| Klingavälsån: Sövdemölla | 55.601371, 13.657192 | 4 | 4 |
| Vombs Bruksgård          | 55.653859, 13.601517 | 4 | 5 |
| Vombs Vattenverk         | 55.658641, 13.541997 | 4 | 5 |

672

673 **Supplementary Table 4.** Community dynamics in the 18 wild populations was analysed as  
 674 the effect of species frequency in 2018 (log-transformed; **A**) and species identity in species  
 675 density change (density in 2019/density in 2018) using a general linear model. Non-  
 676 transformed species frequency in 2018 show qualitatively similar results (**B**).

677 **A**

|                               | F     | df | p              |
|-------------------------------|-------|----|----------------|
| log(Frequency 2018)           | 14.95 | 1  | < <b>0.001</b> |
| Species                       | 0.438 | 1  | 0.512          |
| log(Frequency 2018) : Species | 0.932 | 1  | 0.341          |

678 Adj.  $R^2 = 0.286$

679 **B**

|                          | F     | df | p            |
|--------------------------|-------|----|--------------|
| Frequency 2018           | 18.39 | 1  | <b>0.041</b> |
| Species                  | 0.005 | 1  | 0.972        |
| Frequency 2018 : Species | 5.56  | 1  | 0.25         |

680 Adj.  $R^2 = 0.098$

681 **Supplementary Analysis 1.** We found evidence of small contamination of both species in  
 682 the control cages with allopatric species frequencies (100 % *I. elegans* or *E. cyathigerum*).  
 683 The source of this contamination might have come from larvae or eggs attached to the

684 vegetation used to inoculate the water containers or adult of either species entering the cages  
685 by mistake. The mean contamination in the two *E. cyathigerum* cages was 18% (min = 5%,  
686 max = 31%), and in the two *I. elegans* cages 2% (min = 0.8%, max = 4%). Assuming similar  
687 levels of contamination occurred in the other cages, we performed two corrections to see how  
688 this might have confounded our results. First, we removed from the female productivity of  
689 each cage the mean percentage of contamination of each species, (-18% and -2% of *E.*  
690 *cyathigerum* and *I. elegans*, respectively) (**A**). Second, we performed a more conservative  
691 correction, by instead removing the maximum level of contamination found of each species (-  
692 31% and -4% of *E. cyathigerum* and *I. elegans*, respectively), (**B**). The two models below (**A**  
693 and **B**) were performed using the corrected value of female productivity as response variable,  
694 species frequency, species identity and their interaction as fixed factors in a generalized  
695 linear model. In both cases the results are qualitatively the same as in the uncorrected  
696 emergences and the effects of both “frequency” and “species” remain highly significant (see  
697 also Fig. 3).

698

699 A) Corrected analysis of female productivity assuming mean contamination equivalent to  
700 the control cages.

|                     | F     | df | p            |
|---------------------|-------|----|--------------|
| Frequency           | 28.91 | 1  | <b>0.005</b> |
| Species             | 12.88 | 1  | <b>0.022</b> |
| Frequency : Species | 2.97  | 1  | 0.159        |

701

702 B) Corrected analysis of female productivity assuming maximum contamination  
703 equivalent to the control cages.

|                     | F     | df | p            |
|---------------------|-------|----|--------------|
| Frequency           | 26.72 | 1  | <b>0.006</b> |
| Species             | 16.1  | 1  | <b>0.015</b> |
| Frequency : Species | 4.05  | 1  | 0.114        |

704

705

706
